# Supplementary material for: Colorectal Carcinogenesis in the A/J Min/+ Mouse Model is Inhibited by Hemin, Independently of Dietary Fat Content and Fecal Lipid Peroxidation Rate
Source: PubMed Central journal article supplement (PMC5094071; doi:10.1186/s12885-016-2874-0), 2016-11-02
Supplement: 12885_2016_2874_MOESM1_ESM.pdf [file 12885_2016_2874_MOESM1_ESM.pdf]

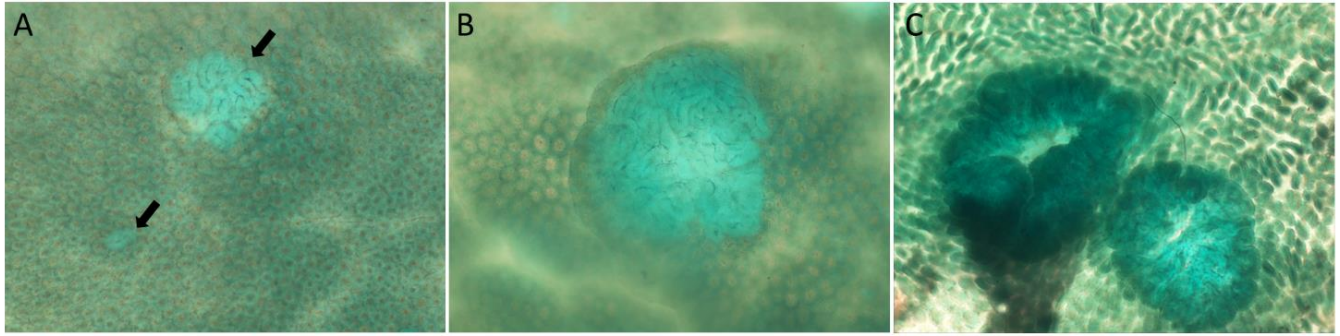

**Figure S1. Representative examples of methylene blue-stained intestinal lesions.** (A) colonic flat ACF, arrows point at flat ACF comprised of one or several aberrant crypts (magnification x100), (B) colonic tumor (magnification x100) and (C) two small intestinal tumors (magnification x40).
