# Supplementary material for: Colorectal Carcinogenesis in the A/J Min/+ Mouse Model is Inhibited by Hemin, Independently of Dietary Fat Content and Fecal Lipid Peroxidation Rate
Source: PubMed Central journal article supplement (PMC5094071; doi:10.1186/s12885-016-2874-0), 2016-11-02
Supplement: 12885_2016_2874_MOESM3_ESM.pdf [file 12885_2016_2874_MOESM3_ESM.pdf]

**Table S3. Final body weight and daily food intake.**

|                                    | <b>Body weight (g)</b> | <b>Food intake (g/animal*day)</b> |
|------------------------------------|------------------------|-----------------------------------|
| <b>Hemin<sup>-</sup>, Low fat</b>  | 18.8 [16.8-20.5]       | 2.4 [2.2-2.7]                     |
| <b>Hemin<sup>+</sup>, Low fat</b>  | 19.9 [18.4-21.5]       | 2.6 [2.4-2.8]                     |
| <b>Hemin<sup>-</sup>, High fat</b> | 19.8 [18.0-21.5]       | 2.7 [2.4-3.1]                     |
| <b>Hemin<sup>+</sup>, High fat</b> | 19.6 [19.1-21.3]       | 2.8 [2.6-3.1]                     |

Results are given as median [IQR].
