# Supplementary material for: Colorectal Carcinogenesis in the A/J Min/+ Mouse Model is Inhibited by Hemin, Independently of Dietary Fat Content and Fecal Lipid Peroxidation Rate
Source: PubMed Central journal article supplement (PMC5094071; doi:10.1186/s12885-016-2874-0), 2016-11-02
Supplement: 12885_2016_2874_MOESM4_ESM.pdf [file 12885_2016_2874_MOESM4_ESM.pdf]

**Table S4. Correlation between fecal water content and intestinal lesions.**

|                               | Number of lesions |         | Lesion size |         | Lesion load |         |
|-------------------------------|-------------------|---------|-------------|---------|-------------|---------|
|                               | $\rho$            | p-value | $\rho$      | p-value | $\rho$      | p-value |
| <i>Colon, flat ACF</i>        | 0.182             | 0.089   | 0.018       | 0.870   | 0.131       | 0.225   |
| <i>Colon, tumor</i>           | 0.171             | 0.112   | 0.151       | 0.162   | 0.172       | 0.110   |
| <i>Small intestine, tumor</i> | 0.099             | 0.357   | 0.054       | 0.618   | 0.075       | 0.490   |

Results are given as  $\rho$ , Spearman's rank correlation coefficient.
